# Supplementary material for: Needs assessment of head nurses on the feedback environment of nursing quality supervision: A cross-sectional survey
Source: Research Square preprint supplement (doi:10.21203/rs.3.rs-7330867/v1), 2025-09-09
Supplement: Supplementary file 1 [file bf816dabf48e19e982715917.docx]

**Nursing quality supervision feedback environment needs assessment questionnaire**

Dear Head Nurses,

we are now standardizing the feedback environment for nursing quality inspections. Through preliminary literature analysis and semi-structured interviews, we have identified four core elements: feedback sources, information content, communication methods, and request mechanisms, with detailed specifications for each component. As head nurses serve dual roles as both inspectors and feedback providers during routine quality checks, we aim to assess their agreement levels regarding these requirements. "Completion and submission of this questionnaire shall be deemed as informed consent".

Contact number: 15703410025.

**Part I: General information**

| **Item** |
| --- |
| **Gender** |
| Male |
| Female |
| **Age(years)** |
| ≤29 |
| 30~39 |
| 40~49 |
| ≥50 |
| **Educational background** |
| Associate degree |
| Bachelor degree |
| Master degree or above |
| **Professional Title** |
| Registered Nurse |
| Senior Staff Nurse |
| Nurse-in-Charge |
| Associate Chief Nurse |
| Chief Nurse |
| **Years of Management Experience** |
| ≤9 |
| 10~19 |
| 20~29 |
| ≥30 |
| **Hospital grade** |
| Tertiary Grade A |
| Tertiary Grade B |
| Secondary Grade A |
| Secondary Grade B |
| **Whether they had received training related to quality issue feedback** |
| Yes |
| No |
| **The frequency of receiving supervision feedback results** |
| Real-time feedback reception |
| Daily feedback reception |
| Weekly feedback reception |
| Biweekly feedback reception |
| Monthly feedback reception |
| Quarterly feedback reception |
| Else |

**Part II: Content and requirements of core elements.**

Instructions: It includes four dimensions, including feedback source, feedback information, feedback method and feedback seeking, with a total of 18 items. The Likert five-point scale is used for scoring.

| **Item** |
| --- |
| **Feedback source dimension** |
| **ⅠRequirements for Supervisors:** |
| I-1 Knowledge reserve: Supervisors should have professional knowledge, inspection ideas and methods. |
| I-2 Evaluation & Judgment: Supervisors should have the ability to assess innovative content and determine the accuracy of nurses' work. |
| **ⅡRequirements for Feedback providers:** |
| Ⅱ-1 Classification and integration: Feedback providers should have the ability to classify and integrate feedback information from different channels. |
| Ⅱ-2 Clear expression: Feedback providers should have a clear ability to express their questions without ambiguity. |
| **Feedback information dimension** |
| **Ⅲ Requirements for sorting and screening:**： |
| Ⅲ-1 Focus on key points: Feedback providers should have the ability to sift through a large number of feedback information to select key and representative information. |
| Ⅲ-2 Integration and refinement: Feedback providers should be able to summarize fragmented questions, eliminate duplication and unimportant content. |
| **Ⅳ** Requirements for describing strategies: |
| Ⅳ-1 The feedbacker's description of feedback information should be structured. |
| Ⅳ-2 The feedbacker's description of feedback information should be multimodal. |
| **Feedback method dimension** |
| **ⅤRequirements for attitude and behavior:** |
| Ⅴ-1 Fairness: Feedback providers should treat all feedback recipients equally, without bias or discrimination. |
| Ⅴ-2 Respect: Feedback providers should uphold the dignity of all recipients, avoiding belittling, blaming, or public shaming. |
| Ⅴ-3 Guidance: Feedback providers should offer concrete improvement suggestions to recipients, rather than merely pointing out problems. |
| **Ⅵ Feedback methods should be adjusted according to objectives：** |
| Ⅵ-1 Appropriate frequency: Feedback frequency should vary based on the stage of the target (e.g., high frequency for urgent improvements, low frequency for long-term monitoring) |
| Ⅵ--2 Feedback valence (positive/negative) : Feedback valence (positive/negative) should differ according to the stage of the target (criticism should include corrective guidance, and praise should not be given indiscriminately). |
| **Feedback seeking dimension** |
| **Ⅶ Requirements for Feedback Channels：** |
| Ⅶ-1 Observation & Inquiry: Supervisees may seek feedback through direct inquiry or indirect observation based on actual situations. |
| Ⅶ-2 Clarity & Accessibility: Clear feedback-seeking channels should be established to assist supervisees in obtaining feedback. |
| **Ⅷ Requirements for Knowledge Translation：** |
| Ⅷ-1 Broad Collection: Comprehensively gather feedback information (input) to prepare for systematization. |
| Ⅷ-2 Systematization: Scientifically integrate knowledge (processing) to form a systematic structure. |
| Ⅷ-3 Replicability: Consolidate knowledge into shareable resources (output) to facilitate dissemination and replication |

Thank you again for completing the questionnaire and wish you good health and success in your work!
